# Supplementary material
Source: publisher figshare collection journal article supplement (https://acs.figshare.com/ndownloader/files/4189321)
Supplement: Supplementary file 1 [file 4189321]

## Supporting Information

### **Monolayers of Diblock Copolymer Micelles by Spin-coating from O-xylene on SiO<sub>x</sub>/Si Studied in Real and Reciprocal Space**

Jiun-You Liou, and Ya-Sen Sun\*

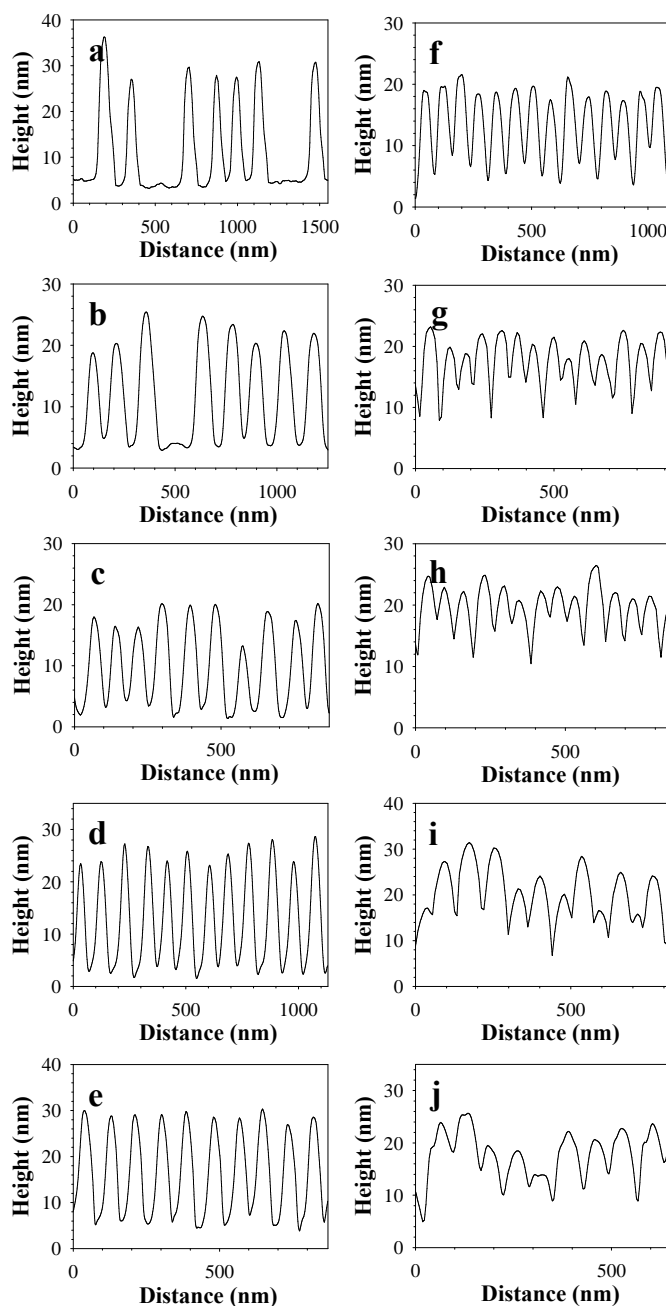

Figure S1 AFM height profiles for micelles on SiO<sub>x</sub>/Si spun from o-xylene solutions containing P(S-*b*-2VP) micelles at mass fractions: (a) 0.1, (b) 0.2, (c) 0.3, (d) 0.4, (e)

0.5, (f) 0.6, (g) 0.7, (h) 0.8, (i) 0.9 and (j) 1.0 mass %.

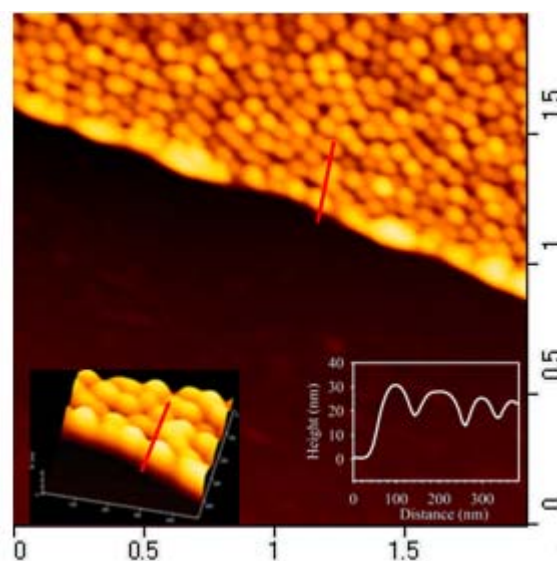

Figure S2 Cross-section AFM image of the surface morphology of a scratched film (initially spin coated from 1 mass% polymer solution). The bottom-left inset reveals a 3-dimensional topography and the bottom-right inset shows a height profile.

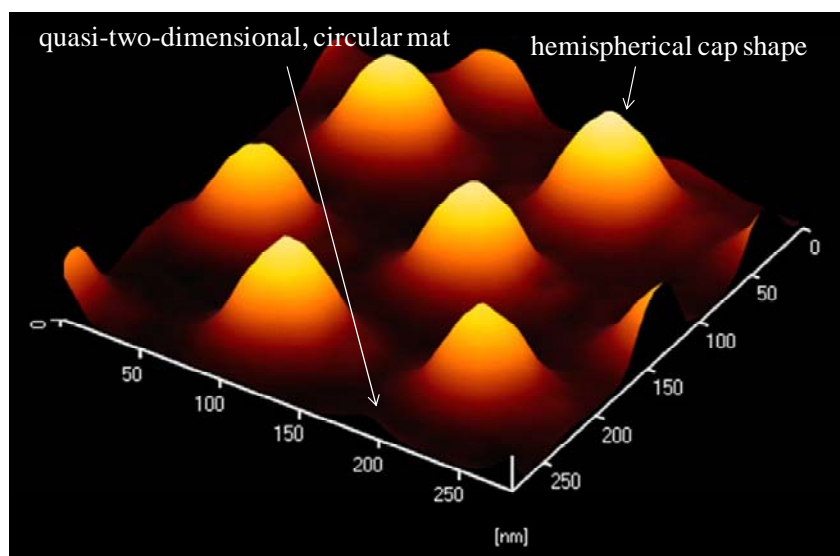

Figure S3 3-dimensional AFM tomography of micelles as-spun from a 0.2 mass % P(S-*b*-2VP) polymer solution.

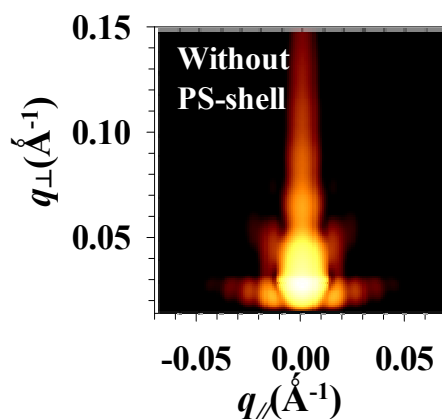

Figure S4 Simulated 2D GISAXS pattern of the form factor of a truncated sphere without PS shell.

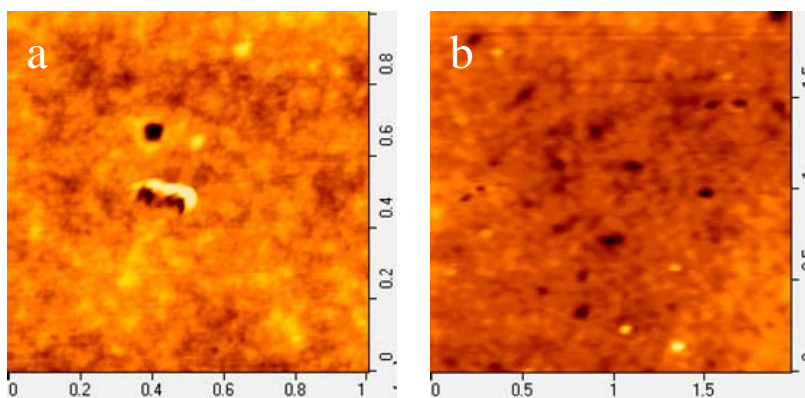

Figure S5 AFM topographies of solvent-annealed thin films in (a) toluene (20 min) and (b) THF (120 min). The sample (a) was prepared by spin coating from a solution of P(S-*b*-2VP) 0.3 mass % in o-xylene whereas the sample (b) was prepared by spin coating from 0.8 mass %
